# Supplementary material for: Dynamic Interplay of Metabolic and Transcriptional Responses in Shrimp during Early and Late Infection Stages of Enterocytozoon hepatopenaei (EHP)
Source: MDPI journal article supplement (doi:10.3390/ijms242316738), 2023-11-25
Supplement: s1 [file s1]

(a)

Multi-coordinate enrichment bubble map (Asn vs Asp)

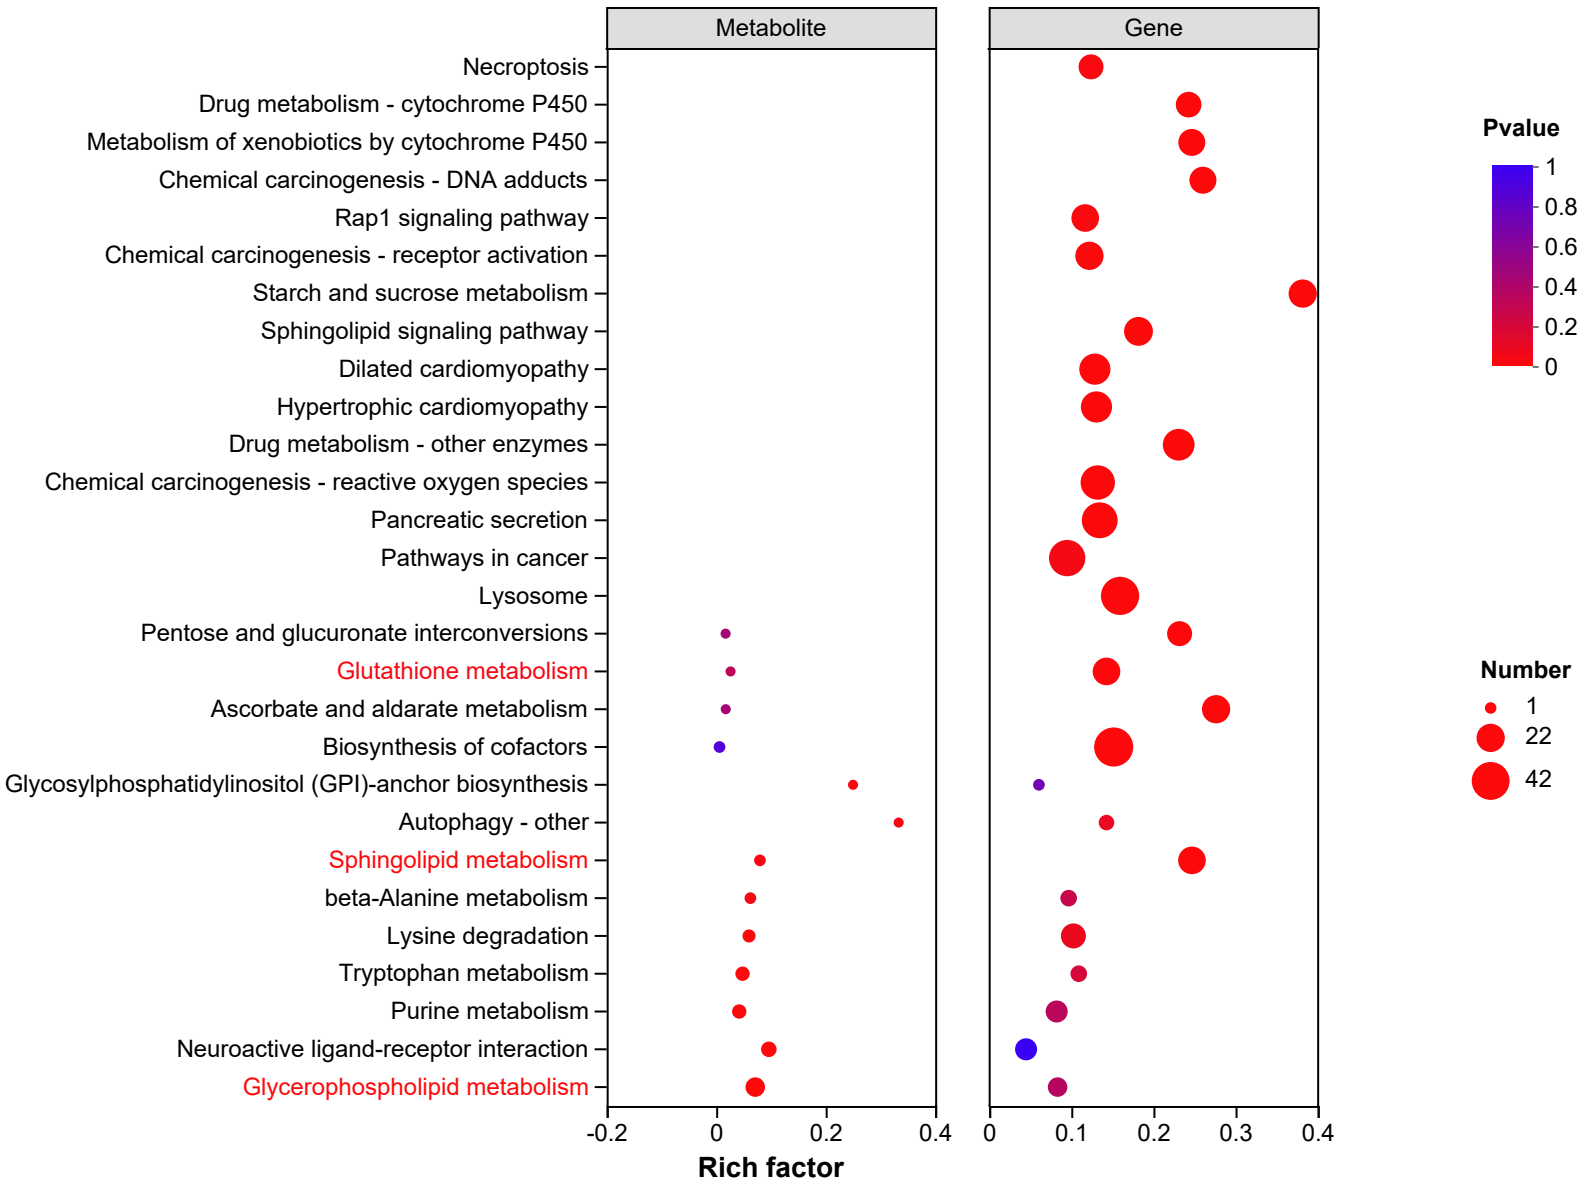

● Pathways important in late infection (important pathways co-enriched by DEGs and SDMs).

(b)

Multi-coordinate enrichment bubble map (Jsn vs Jsp)

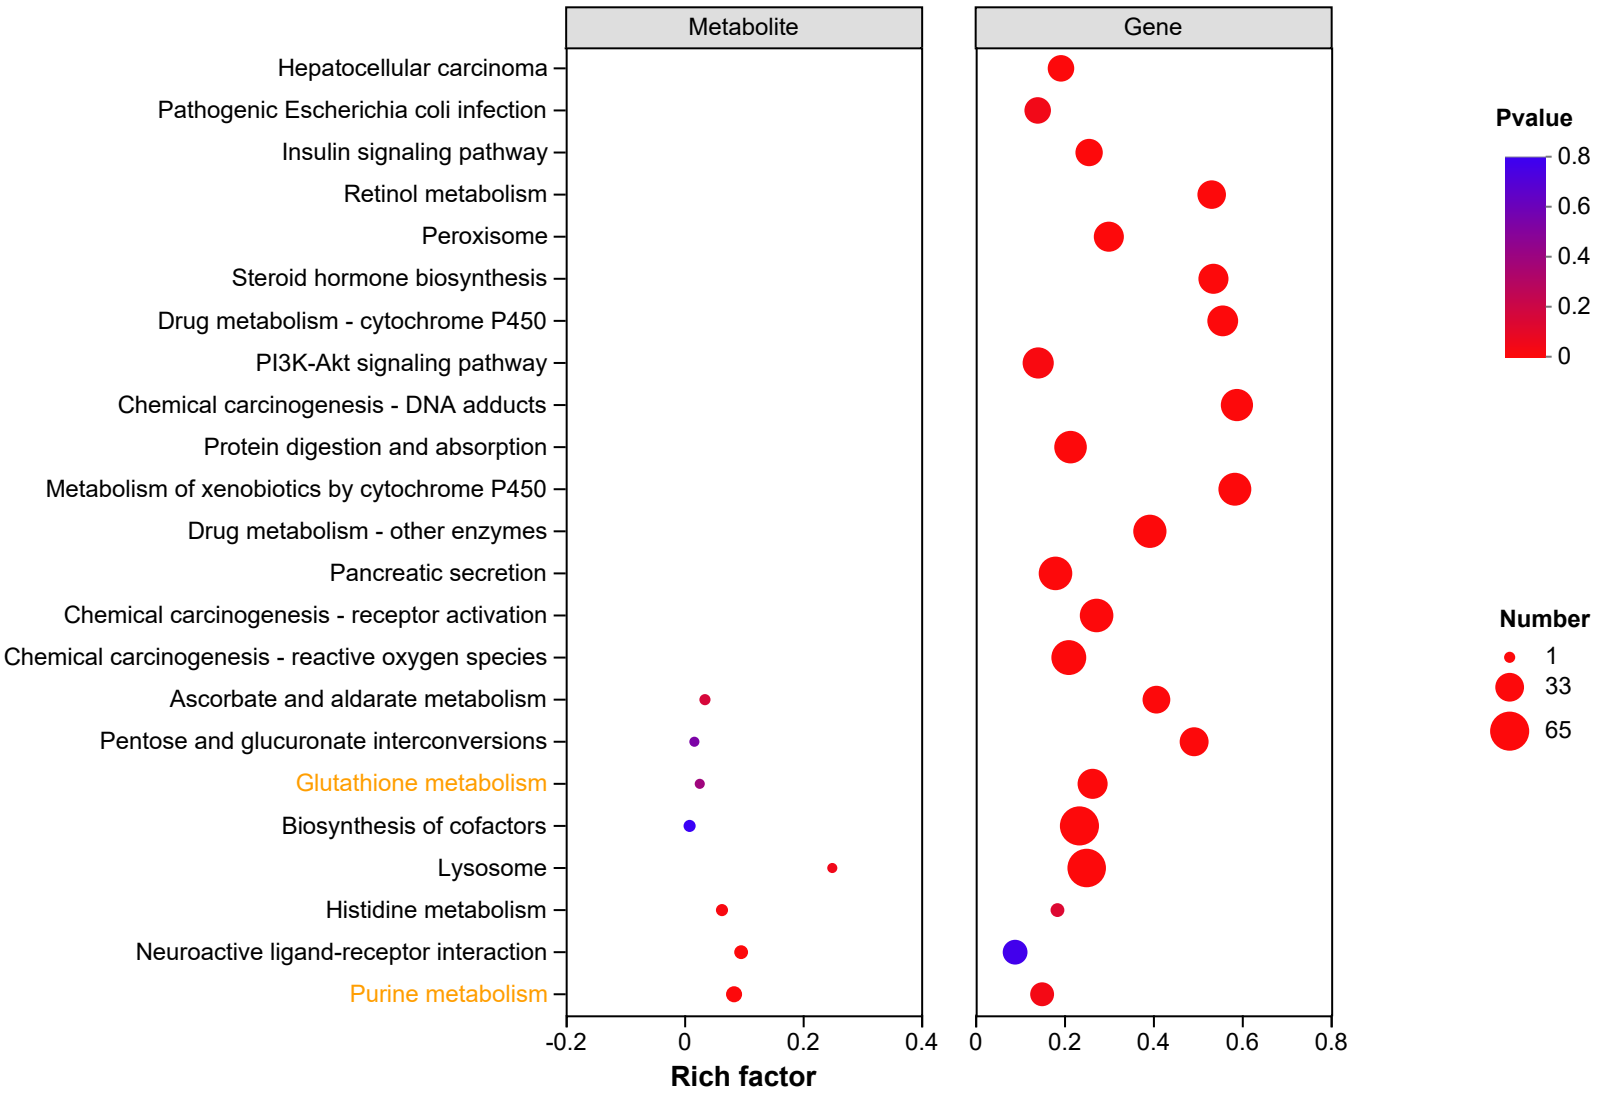

● Pathways that are important in the early stages of infection (important pathways co-enriched by DEGs and SDMs).
