# Supplementary material for: Dynamic Interplay of Metabolic and Transcriptional Responses in Shrimp during Early and Late Infection Stages of Enterocytozoon hepatopenaei (EHP)
Source: Int J Mol Sci. 2023 Nov 25;24(23):16738. doi: 10.3390/ijms242316738 (PMC10706788; doi:10.3390/ijms242316738)
Supplement: Supplementary file 1 [file ijms-24-16738-s001.zip]

Archive with 12 entries (12 files):
- Figure legends.pdf
- Figure S1.pdf
- Figure S2.pdf
- Figure S3.pdf
- Figure S4.pdf
- Figure S5.pdf
- Table S1.xlsx
- Table S2.xlsx
- Table S3.xlsx
- Table S4.xlsx
- Table S5.xlsx
- Table S6.xlsx
