# Supplementary material for: Dynamic Interplay of Metabolic and Transcriptional Responses in Shrimp during Early and Late Infection Stages of Enterocytozoon hepatopenaei (EHP)
Source: Int J Mol Sci. 2023 Nov 25;24(23):16738. doi: 10.3390/ijms242316738 (PMC10706788; doi:10.3390/ijms242316738)
Supplement: Supplementary file 1 [file ijms-24-16738-s001.zip › Table S1.xlsx]

## Sheet: Sheet1
Table S1. Details of the list of DEGs shared by the four groups of Venn diagrams.
Gene name	Gene description	Log2FC(Jsn/Jsp)	Padjust(Jsn/Jsp)	Significant(Jsn/Jsp)	Regulate(Jsn/Jsp)	Log2FC(Asn/Asp)	Padjust(Asn/Asp)	Significant(Asn/Asp)	Regulate(Asn/Asp)
LOC113800111	peritrophin-1-like	4.7266	6.08906e-07	yes	up	5.68728	1.12694e-10	yes	up
LOC113800295	flightin-like	-3.23712	0.000234551	yes	down	5.72991	8.2055e-05	yes	up
LOC113800564	D-3-phosphoglycerate dehydrogenase-like	-6.63318	2.04266e-13	yes	down	1.36464	0.0109601	yes	up
LOC113800626	peritrophin-1-like	1.74127	0.00213873	yes	up	3.84103	0.00184189	yes	up
LOC113800848	D-serine dehydratase-like	-2.86573	0.00133669	yes	down	2.56311	0.0435598	yes	up
LOC113802439	uncharacterized LOC113802439	3.39094	6.93221e-05	yes	up	-1.88094	0.024805	yes	down
LOC113802845	uncharacterized LOC113802845	-6.66352	0.000206021	yes	down	-6.40528	0.0315272	yes	down
LOC113802980	UDP-glucuronosyltransferase 1-8-like	-7.50626	4.61295e-11	yes	down	2.4616	0.019785	yes	up
LOC113802990	inactive hydroxysteroid dehydrogenase-like protein 1	-2.85115	0.0213637	yes	down	3.19038	2.13979e-05	yes	up
LOC113803001	serine/threonine-protein kinase unc-51-like	2.51795	3.65224e-06	yes	up	-2.06681	0.00636057	yes	down
LOC113803031	protein unzipped-like	-2.65517	0.000133524	yes	down	1.84754	0.00117821	yes	up
LOC113803695	pancreatic alpha-amylase-like	-2.2859	0.000452085	yes	down	-1.83546	0.00905204	yes	down
LOC113803832	-	-7.4844	1.73084e-05	yes	down	9.54481	0.000444314	yes	up
LOC113803841	-	-7.98755	2.12483e-05	yes	down	9.71289	1.76801e-09	yes	up
LOC113803868	trinucleotide repeat-containing gene 6B protein-like	2.30426	0.0356777	yes	up	1.18135	0.0320719	yes	up
LOC113803874	uncharacterized LOC113803874	-5.28263	6.65338e-23	yes	down	-2.67832	0.0174448	yes	down
LOC113804312	monocarboxylate transporter 5-like	-8.62544	1.98226e-07	yes	down	3.07435	0.0201959	yes	up
LOC113804666	flotillin-2-like	2.15937	0.00171971	yes	up	-2.40485	0.000379739	yes	down
LOC113804725	uncharacterized LOC113804725	-5.06119	2.00715e-10	yes	down	1.43693	0.0343501	yes	up
LOC113805143	putative GPI-anchor transamidase	1.63832	0.0155157	yes	up	-2.61754	0.0119466	yes	down
LOC113806121	alkyldihydroxyacetonephosphate synthase, peroxisomal-like	-1.09842	0.0323915	yes	down	1.99024	0.000101174	yes	up
LOC113806553	muscle LIM protein Mlp84B-like, transcript variant X1	-3.0995	0.000198302	yes	down	1.82777	0.00757481	yes	up
LOC113806564	creatinase-like	-4.34398	8.61779e-06	yes	down	2.62379	0.00157855	yes	up
LOC113806663	-	-1.79019	0.00858617	yes	down	3.26297	3.91069e-10	yes	up
LOC113807081	proteoglycan 4-like	3.96355	1.58461e-06	yes	up	-2.91874	0.00468264	yes	down
LOC113807089	pyridine nucleotide-disulfide oxidoreductase domain-containing protein 2-like	-3.27182	2.18291e-05	yes	down	2.82104	0.00808875	yes	up
LOC113807157	-	-3.5343	0.00467971	yes	down	5.85499	0.00124879	yes	up
LOC113807230	-	-12.5402	1.72112e-19	yes	down	6.31369	2.33342e-06	yes	up
LOC113807231	beta,beta-carotene 9',10'-oxygenase-like	-5.96771	6.01933e-06	yes	down	5.34626	1.33706e-07	yes	up
LOC113807286	uncharacterized LOC113807286, transcript variant X1	-4.82327	0.000165372	yes	down	3.65832	0.000339475	yes	up
LOC113807290	uncharacterized LOC113807290	-6.59658	0.000271173	yes	down	2.3514	0.00916981	yes	up
LOC113808328	phytanoyl-CoA dioxygenase domain-containing protein 1-like, transcript variant X2	-5.24807	1.08097e-11	yes	down	1.76685	0.0347568	yes	up
LOC113808550	5E5 antigen-like	2.96092	0.0319538	yes	up	-2.27104	4.84388e-05	yes	down
LOC113809123	-	-7.07789	6.20437e-31	yes	down	2.09301	0.00042905	yes	up
LOC113809290	uncharacterized LOC113809290	-7.8363	1.78463e-06	yes	down	2.24761	0.000251343	yes	up
LOC113809322	fibrillin-1-like, transcript variant X1	-3.78949	0.000796623	yes	down	2.14878	0.000182393	yes	up
LOC113809503	flavin-containing monooxygenase FMO GS-OX5-like, transcript variant X1	-3.31002	0.000137286	yes	down	3.64477	0.000373975	yes	up
LOC113809777	glycogen debranching enzyme-like	-1.72686	0.0473999	yes	down	2.52499	3.19427e-07	yes	up
LOC113809813	flocculation protein FLO11-like	8.95657	2.42207e-06	yes	up	-3.48426	0.0153632	yes	down
LOC113810044	collectin-11-like, transcript variant X1	-4.56543	1.18141e-07	yes	down	2.41009	0.000954162	yes	up
LOC113810056	uncharacterized LOC113810056	9.84192	2.58082e-21	yes	up	3.33723	0.000338146	yes	up
LOC113810615	hemocyanin C chain-like	-12.5469	2.9657e-19	yes	down	2.87528	0.0406808	yes	up
LOC113810616	hemocyanin C chain-like	-16.0978	4.79806e-36	yes	down	3.64002	0.000112162	yes	up
LOC113810735	formimidoyltransferase-cyclodeaminase-like	-2.04724	0.00406675	yes	down	2.55045	0.0011926	yes	up
LOC113810835	uncharacterized LOC113810835	-2.15606	0.000413564	yes	down	1.80624	0.00723031	yes	up
LOC113811680	cytochrome P450 3A29-like	-2.78564	0.0335335	yes	down	-3.64065	4.32815e-05	yes	down
LOC113812011	methyltransferase-like protein 7A	-1.81514	0.0315522	yes	down	2.71999	3.09232e-05	yes	up
LOC113812229	2-aminoethylphosphonate--pyruvate transaminase-like	-6.58051	1.38416e-13	yes	down	4.365	0.000992681	yes	up
LOC113812532	transient receptor potential cation channel trpm-like	3.6072	1.25402e-07	yes	up	-1.71342	0.0331262	yes	down
LOC113812552	glutathione S-transferase 1-like	-11.1824	8.79876e-32	yes	down	-5.33799	2.18154e-08	yes	down
LOC113812628	uncharacterized LOC113812628	-3.30244	0.000354903	yes	down	4.42926	3.19427e-07	yes	up
LOC113813188	cubilin-like, transcript variant X1	-6.67503	0.00896831	yes	down	6.3878	0.00267848	yes	up
LOC113813369	uncharacterized LOC113813369	-7.98585	2.37255e-21	yes	down	2.50899	0.0346921	yes	up
LOC113813381	uncharacterized LOC113813381	-2.74529	0.0014739	yes	down	1.59422	0.0252589	yes	up
LOC113813503	basic proline-rich protein-like	-2.34027	0.00623687	yes	down	2.3225	0.016675	yes	up
LOC113813554	ficolin-1-like	-4.86205	5.88088e-06	yes	down	3.50966	5.71003e-05	yes	up
LOC113813743	uncharacterized LOC113813743	4.09884	3.50941e-11	yes	up	-1.94491	0.0397127	yes	down
LOC113813744	uncharacterized LOC113813744	3.46293	0.00112019	yes	up	-3.45539	0.0029281	yes	down
LOC113814208	long-chain-fatty-acid--CoA ligase ACSBG2-like, transcript variant X3	-2.07715	0.00164258	yes	down	1.45952	0.0363357	yes	up
LOC113814219	-	4.38551	3.07063e-06	yes	up	-1.84604	0.0451993	yes	down
LOC113814365	proclotting enzyme-like	-2.31909	0.00258902	yes	down	3.04483	0.00154105	yes	up
LOC113814497	uncharacterized LOC113814497	-3.22162	0.0032104	yes	down	3.72456	7.04572e-05	yes	up
LOC113814949	acyl-CoA dehydrogenase family member 9, mitochondrial-like	-6.74777	1.15473e-06	yes	down	4.77986	0.000689669	yes	up
LOC113815027	apolipoprotein D-like	4.69157	1.55897e-08	yes	up	-2.69624	0.00653855	yes	down
LOC113815120	actin, muscle-like	-3.15327	0.000189496	yes	down	2.30553	0.000146921	yes	up
LOC113815121	actin, muscle-like, transcript variant X2	-3.04369	6.71193e-16	yes	down	2.97733	9.34547e-11	yes	up
LOC113815129	actin-2, muscle-specific-like, transcript variant X3	-2.77285	0.00183503	yes	down	4.01376	9.17792e-06	yes	up
LOC113815367	beta,beta-carotene 15,15'-dioxygenase-like	-3.69098	0.00557741	yes	down	-2.96722	4.40057e-06	yes	down
LOC113815564	-	-2.50856	0.000397195	yes	down	-2.72832	3.24313e-10	yes	down
LOC113815675	acyl-CoA-binding protein-like	-3.01437	0.000958322	yes	down	-5.41381	3.40603e-08	yes	down
LOC113816053	uncharacterized LOC113816053	-3.40071	4.44129e-06	yes	down	1.35318	0.0258064	yes	up
LOC113816301	SPARC-like	-2.06587	0.0074947	yes	down	1.65896	0.0193535	yes	up
LOC113816345	phosphatidylcholine_ceramide cholinephosphotransferase 1-like, transcript variant X1	1.12336	0.016917	yes	up	-1.17827	0.0170706	yes	down
LOC113816839	delta(24)-sterol reductase-like	-2.11088	8.61147e-05	yes	down	1.76933	0.0331048	yes	up
LOC113817096	retinol dehydrogenase 13-like	-7.31216	1.72894e-08	yes	down	4.13494	2.52365e-06	yes	up
LOC113817487	arylsulfatase H-like	-12.8427	1.39244e-22	yes	down	-3.46658	6.72304e-05	yes	down
LOC113817572	dehydrogenase/reductase SDR family member 11-like	-4.50999	3.14129e-11	yes	down	2.1713	0.0291715	yes	up
LOC113817723	alpha-amylase 1-like	-2.9483	0.000292791	yes	down	-2.21667	0.0240651	yes	down
LOC113817979	uncharacterized LOC113817979	-1.64445	0.0191517	yes	down	3.11397	2.89431e-07	yes	up
LOC113818340	uncharacterized LOC113818340	-3.44527	3.99434e-07	yes	down	2.88172	3.19741e-06	yes	up
LOC113818510	uncharacterized LOC113818510	-8.42997	6.00211e-16	yes	down	4.29188	0.0020621	yes	up
LOC113818539	calcium-activated chloride channel regulator 1-like, transcript variant X3	4.02649	6.72457e-33	yes	up	-3.22909	0.0011718	yes	down
LOC113818642	poly(U)-specific endoribonuclease homolog	-3.67378	1.6753e-05	yes	down	2.97605	2.33308e-05	yes	up
LOC113820016	forkhead box protein O-like, transcript variant X1	1.55686	0.0349225	yes	up	-2.20193	0.00397726	yes	down
LOC113820165	atrial natriuretic peptide receptor 2-like	3.2947	0.00122168	yes	up	-1.4297	0.0179052	yes	down
LOC113820218	putative aminopeptidase W07G4.4	-2.84241	3.3402e-05	yes	down	1.3959	0.023784	yes	up
LOC113820644	macrophage mannose receptor 1-like	-12.5643	1.25533e-28	yes	down	-3.76858	4.6942e-09	yes	down
LOC113821256	uncharacterized LOC113821256	-9.5934	5.46854e-30	yes	down	-2.6069	0.0161812	yes	down
LOC113821504	uncharacterized LOC113821504	-2.73236	0.000982247	yes	down	5.91098	0.000201206	yes	up
LOC113822122	uncharacterized LOC113822122	-4.32563	0.00568767	yes	down	4.32217	0.000955633	yes	up
LOC113822233	cell surface glycoprotein 1-like	-4.73115	0.000439875	yes	down	2.08083	4.83343e-07	yes	up
LOC113822330	uncharacterized LOC113822330	-7.1093	7.49873e-07	yes	down	2.81403	0.0473797	yes	up
LOC113822379	keratin, type I cytoskeletal 9-like	-5.10455	0.000174583	yes	down	5.14187	3.63734e-07	yes	up
LOC113822686	myosin light chain alkali-like, transcript variant X2	-2.71818	0.0228969	yes	down	5.36091	0.000178167	yes	up
LOC113822802	cytochrome P450 9e2-like	3.36294	0.0336586	yes	up	-3.88716	0.000983095	yes	down
LOC113823186	sulfotransferase 1C4-like, transcript variant X1	-6.60525	0.0010083	yes	down	-3.06606	4.44733e-05	yes	down
LOC113823620	hemocyanin C chain-like	-15.6776	3.23832e-69	yes	down	2.90622	0.0220266	yes	up
LOC113823622	hemocyanin C chain-like	-16.6076	4.43952e-80	yes	down	4.86585	0.00629523	yes	up
LOC113823623	hemocyanin C chain-like	-15.7687	4.18945e-36	yes	down	5.28462	9.41742e-05	yes	up
LOC113823624	hemocyanin C chain-like	-14.0589	2.50218e-20	yes	down	6.16288	8.71064e-07	yes	up
LOC113823629	hemocyanin C chain-like	-16.6978	1.02242e-90	yes	down	4.12784	0.012239	yes	up
LOC113823633	hemocyanin C chain-like	-15.6055	4.56998e-33	yes	down	4.1958	0.00014099	yes	up
LOC113823638	pseudohemocyanin-2-like	-16.1256	1.32332e-46	yes	down	4.00312	0.000642594	yes	up
LOC113823643	hemocyanin C chain-like	-15.7103	1.67824e-41	yes	down	4.09257	0.0135426	yes	up
LOC113823645	hemocyanin C chain-like	-13.3949	2.32858e-17	yes	down	3.60009	0.0017613	yes	up
LOC113823646	hemocyanin C chain-like	-14.6421	4.50566e-25	yes	down	4.14387	0.00012841	yes	up
LOC113823647	hemocyanin C chain-like	-14.176	1.64678e-56	yes	down	4.79949	5.23157e-08	yes	up
LOC113823649	hemocyanin C chain-like	-13.2569	5.48818e-22	yes	down	6.33227	3.54317e-06	yes	up
LOC113824103	putative glucosylceramidase 3	-8.26077	8.72431e-24	yes	down	-2.53886	0.00016175	yes	down
LOC113824295	leukocyte elastase inhibitor B-like	-2.9329	0.00289444	yes	down	-5.26617	3.06682e-06	yes	down
LOC113824723	crustacyanin-A2 subunit-like	-3.66885	3.30265e-06	yes	down	2.74842	0.000392337	yes	up
LOC113825694	microtubule-associated proteins 1A/1B light chain 3A-like	1.8883	4.29638e-06	yes	up	-1.52911	0.0327417	yes	down
LOC113825850	uncharacterized LOC113825850	2.70221	4.47794e-06	yes	up	-1.99912	0.00360559	yes	down
LOC113826280	pleckstrin homology-like domain family B member 1	2.01208	0.000113669	yes	up	-1.63085	0.000174443	yes	down
LOC113827196	heparanase-like	-5.59071	8.70458e-07	yes	down	3.25356	0.00224725	yes	up
LOC113827353	glutamate-gated chloride channel-like	-1.75388	0.0303532	yes	down	4.14483	0.00381338	yes	up
LOC113827416	gamma-butyrobetaine dioxygenase-like	-4.25242	5.532e-09	yes	down	2.81865	0.0020621	yes	up
LOC113827577	neprilysin-1-like	5.14783	0.0264134	yes	up	-3.20988	0.00332063	yes	down
LOC113827653	probable cytochrome P450 301a1, mitochondrial	-3.76443	2.7223e-06	yes	down	3.70222	2.02015e-11	yes	up
LOC113827755	probable very-long-chain enoyl-CoA reductase art-1	-2.79464	2.1292e-08	yes	down	2.3674	4.44733e-05	yes	up
LOC113828208	nuclear hormone receptor FTZ-F1-like, transcript variant X1	1.33114	0.00938926	yes	up	-1.94559	0.0391507	yes	down
LOC113828783	uncharacterized LOC113828783, transcript variant X2	2.01602	1.61279e-08	yes	up	-1.71348	0.00280669	yes	down
LOC113828923	sphingomyelin phosphodiesterase-like	-4.19847	1.59331e-12	yes	down	-3.77487	2.09655e-05	yes	down
LOC113829279	uncharacterized LOC113829279	-3.51825	1.60961e-11	yes	down	3.32728	0.000220897	yes	up
LOC113830578	uncharacterized LOC113830578, transcript variant X4	-2.70474	0.0021972	yes	down	2.09371	0.0117441	yes	up
