# Supplementary material for: Dynamic Interplay of Metabolic and Transcriptional Responses in Shrimp during Early and Late Infection Stages of Enterocytozoon hepatopenaei (EHP)
Source: Int J Mol Sci. 2023 Nov 25;24(23):16738. doi: 10.3390/ijms242316738 (PMC10706788; doi:10.3390/ijms242316738)
Supplement: Supplementary file 1 [file ijms-24-16738-s001.zip › Table S2.xlsx]

## Sheet: Sheet1
Table S2. Some DEGs related to detoxification, growth, immunity, metabolism.
Gene ID	Gene description	Regulated	Log2FoldChange
Asn vs Asp Activation pathway
Detoxification-related genes
LOC113815619	UDP-glucuronosyltransferase 2C1-like	up	2.35141
LOC113829277	liver carboxylesterase 2-like, transcript variant X1	up	1.89034
LOC113829050	microsomal glutathione S-transferase 3-like, transcript variant X1	up	1.50714
LOC113816128	hypoxanthine-guanine phosphoribosyltransferase-like, transcript variant X1	up	1.991
LOC113822637	microsomal glutathione S-transferase 1-like, transcript variant X2	up	2.20618
LOC113809531	beta-glucuronidase-like	up	1.20334
LOC113805053	glutathione S-transferase 1-like	up	5.45854
LOC113816325	indole-3-acetaldehyde oxidase-like	up	1.98302
LOC113828399	thiopurine S-methyltransferase-like	up	1.60184
LOC113801634	hypoxanthine-guanine phosphoribosyltransferase-like	up	1.96779
LOC113806325	UDP-glucuronosyltransferase 2B14-like, transcript variant X1	up	1.40974
Immunoreactivity-related genes
LOC113827259	carbonyl reductase [NADPH] 1-like	up	1.84164
LOC113814676	epoxide hydrolase 1-like	up	3.046
Asn vs Asp Inhibitory pathway
Lipid metabolism-related genes
LOC113812851	sphingomyelin phosphodiesterase-like, transcript variant X2	down	-3.49306
LOC113810321	sphingomyelin phosphodiesterase-like	down	-3.03165
LOC113821014	sphingomyelin phosphodiesterase-like	down	-2.36915
LOC113802190	sphingomyelin phosphodiesterase-like	down	-2.98754
LOC113810646	sphingomyelin phosphodiesterase-like	down	-2.99009
LOC113828906	sphingomyelin phosphodiesterase-like, transcript variant X1	down	-3.10718
LOC113813342	lipase 3-like	down	-3.62401
LOC113805268	group XV phospholipase A2-like	down	-1.9296
LOC113804053	phospholipase A2-like	down	-1.38719
LOC113823538	ethanolamine-phosphate cytidylyltransferase-like	down	-1.22625
Apoptosis action-related genes
LOC113811749	ras-related protein ced-10-like, transcript variant X1	down	-1.10654
LOC113806681	apoptosis-stimulating of p53 protein 2-like	down	-1.50123
LOC113805778	caspase-1-like	down	-1.37954
Jsn vs Jsp Activation pathway
Immunoreactivity-related genes
LOC113820016	forkhead box protein O-like, transcript variant X1	up	1.46133
LOC113830594	3-phosphoinositide-dependent protein kinase 1-like, transcript variant X1	up	1.68857
LOC113814495	putative lysozyme-like protein	up	3.10807
LOC113817579	protein enhancer of sevenless 2B-like, transcript variant X1	up	1.25292
LOC113808838	CREB-binding protein-like, transcript variant X2	up	3.42996
LOC113803634	vascular endothelial growth factor receptor 2-like, transcript variant X1	up	1.74604
LOC113801201	mitogen-activated protein kinase 1-like	up	2.135
LOC113822938	eukaryotic translation initiation factor 2 subunit 1-like	up	23.0398
Lipid metabolism-related genes
LOC113829801	sterol regulatory element-binding protein 1-like, transcript variant X1	up	2.04329
LOC113815940	fatty acid synthase-like	up	6.21635
LOC113810591	adiponectin receptor protein-like	up	1.78641
Apoptosis action-related genes
LOC113825161	cytochrome c, transcript variant X1	up	1.06843
LOC113811776	baculoviral IAP repeat-containing protein 8-like	up	3.99327
LOC113805735	apoptosis inhibitor 5-like	up	2.0542
Jsn vs Jsp Inhibitory pathway
Detoxification-related genes
LOC113815619	UDP-glucuronosyltransferase 2C1-like	down	-2.17637
LOC113815629	UDP-glucuronosyltransferase 2B19-like	down	-4.15277
LOC113812552	glutathione S-transferase 1-like	down	-8.29773
LOC113826926	glutathione S-transferase theta-1-like	down	-2.58544
LOC113822637	microsomal glutathione S-transferase 1-like, transcript variant X2	down	-1.40544
LOC113815570	UDP-glucuronosyltransferase 2B14-like	down	-3.89031
LOC113809671	UDP-glucuronosyltransferase 2B16-like	down	-2.65446
LOC113816325	indole-3-acetaldehyde oxidase-like	down	-2.43638
LOC113829262	glutathione S-transferase Mu 3-like	down	-2.81129
LOC113817634	glutathione S-transferase T2-like	down	-2.16852
LOC113829084	microsomal glutathione S-transferase 3-like, transcript variant X1	down	-2.9746
LOC113823673	peroxiredoxin-6-like	down	-2.1016
Ecdysteroid growth-related genes
LOC113827851	estrogen sulfotransferase-like	down	-8.09697
LOC113802141	estradiol 17-beta-dehydrogenase 8-like	down	-1.95806
LOC113808727	steroid hormone receptor ERR1-like	down	-3.27371
LOC113823899	3-oxo-5-alpha-steroid 4-dehydrogenase 1-like	down	-1.53075
LOC113828952	epidermal growth factor receptor-like	down	-4.74788
