# Supplementary material for: Dynamic Interplay of Metabolic and Transcriptional Responses in Shrimp during Early and Late Infection Stages of Enterocytozoon hepatopenaei (EHP)
Source: Int J Mol Sci. 2023 Nov 25;24(23):16738. doi: 10.3390/ijms242316738 (PMC10706788; doi:10.3390/ijms242316738)
Supplement: Supplementary file 1 [file ijms-24-16738-s001.zip › Table S3.xlsx]

## Sheet: Sheet1
Table S3. Expression of some important related DEGs at different developmental stages. Expression of some important related DEGs at different developmental stages.
Gene name	Gene description	Asn vs Asp				Jsn vs Jsp
		Log2FC	Padjust	Significant	Regulate	Log2FC	Padjust	Significant	Regulate
LOC113828208	nuclear hormone receptor FTZ-F1-like, transcript variant X1	-1.94559	0.0391507	yes	down	1.33114	0.00938926	yes	up
LOC113811680	cytochrome P450 3A29-like	-3.64065	4.32815e-05	yes	down	-2.78564	0.0335335	yes	down
LOC113811052	ATP synthase subunit delta, mitochondrial-like	1.15804	0.016286	yes	up	-1.00894	0.0308848	yes	down
LOC113813611	troponin I-like, transcript variant X2	2.79149	0.0173277	yes	up	-1.78059	0.0426175	yes	down
LOC113827751	5'-nucleotidase-like	2.86723	0.00138933	yes	up	-5.58587	0.0055747	yes	down
LOC113829848	glucose-6-phosphatase-like	0	1	No	noSign	-2.72415	0.0171239	yes	down
LOC113802711	acyl-CoA synthetase family member 2, mitochondrial-like	0	1	No	noSign	-5.1758	6.3535e-18	yes	down
LOC113811726	4-coumarate--CoA ligase-like, transcript variant X1	0	1	No	noSign	-3.96236	1.51412e-05	yes	down
LOC113829801	sterol regulatory element-binding protein 1-like, transcript variant X1	0	1	No	noSign	1.96034	0.0080431	yes	up
LOC113825161	cytochrome c, transcript variant X1	0	1	No	noSign	1.24859	0.0014788	yes	up
LOC113813530	troponin C-like, transcript variant X1	0	1	No	noSign	-3.31332	0.000966199	yes	down
LOC113815921	sodium/potassium-transporting ATPase subunit alpha-like	0	1	No	noSign	1.7904	0.0183399	yes	up
LOC113811819	neuroblastoma-amplified sequence-like, transcript variant X1	0	1	No	noSign	1.19632	0.0167709	yes	up
LOC113815924	sodium/potassium-transporting ATPase subunit alpha-like, transcript variant X1	1.05586	0.0258531	yes	up	0	1	No	noSign
LOC113826924	calcium/calmodulin-dependent protein kinase type II alpha chain-like	-1.12575	0.0227941	yes	down	0	1	No	noSign
LOC113825655	troponin C, isotype gamma-like, transcript variant X2	1.93771	0.00377362	yes	up	-1.58878	0.000467718	yes	down
LOC113827695	sodium/potassium-transporting ATPase subunit beta-like, transcript variant X2	-1.34601	0.0266877	yes	down	0	1	No	noSign
LOC113804690	4-coumarate--CoA ligase-like	0	1	No	noSign	-7.05156	3.20916e-10	yes	down
LOC113805477	nicotinamide phosphoribosyltransferase-like	0	1	No	noSign	-4.66624	4.49873e-05	yes	down
LOC113821058	dentin sialophosphoprotein-like, transcript variant X1	0	1	No	noSign	4.27551	1.69628e-15	yes	up
LOC113828284	ras-related protein Rab-2A	-1.03805	0.0357999	yes	down	0	1	No	noSign
LOC113818326	dual specificity mitogen-activated protein kinase kinase 1-like	0	1	No	noSign	2.32336	0.0045093	yes	up
LOC113814915	protein Mo25-like, transcript variant X1	0	1	No	noSign	1.28117	3.25252e-06	yes	up
LOC113816314	1-phosphatidylinositol 4,5-bisphosphate phosphodiesterase epsilon-1-like	0	1	No	noSign	-2.385	1.22378e-06	yes	down
LOC113800054	serine/threonine-protein phosphatase 2A catalytic subunit beta isoform	0	1	No	noSign	1.03884	0.0208062	yes	up
LOC113824266	serine/threonine-protein phosphatase 2A regulatory subunit B'' subunit beta-like	-2.79572	1.96628e-05	yes	down	0	1	No	noSign
LOC113817292	dopamine D2-like receptor	3.88729	0.034698	yes	up	0	1	No	noSign
LOC113824256	phosphoenolpyruvate carboxykinase, cytosolic [GTP]-like	0	1	No	noSign	3.70832	1.21553e-06	yes	up
LOC113828991	GTP_AMP phosphotransferase AK3, mitochondrial-like	2.7867	1.56878e-06	yes	up	0	1	No	noSign
LOC113810177	IDLSRF-like peptide	0	1	No	noSign	-3.2766	0.00245307	yes	down
LOC113818504	peroxisomal acyl-coenzyme A oxidase 1-like	0	1	No	noSign	-2.85001	0.00284915	yes	down
LOC113806957	acyl-coenzyme A synthetase ACSM3, mitochondrial-like	0	1	No	noSign	2.28192	1.01784e-05	yes	up
LOC113810232	natural resistance-associated macrophage protein 2-like, transcript variant X2	1.49913	0.00301309	yes	up	0	1	No	noSign
LOC113819273	uncharacterized LOC113819273	0	1	No	noSign	-4.73651	1.49422e-11	yes	down
LOC113825750	adenylate cyclase type 2-like	0	1	No	noSign	1.46883	0.000829071	yes	up
LOC113828893	probable 4-coumarate--CoA ligase 3	2.32148	0.00142586	yes	up	0	1	No	noSign
LOC113811025	cuticle protein AMP4-like	-8.55964	0.000317912	yes	down	-10.2057	7.46832e-07	yes	down
LOC113828285	glutamate receptor ionotropic, kainate 2-like	-3.87073	0.040041	yes	down	0	1	No	noSign
LOC113829285	5-exo-hydroxycamphor dehydrogenase-like, transcript variant X1	0	1	No	noSign	2.3193	0.00552462	yes	up
LOC113820097	serine/threonine-protein kinase mTOR-like	0	1	No	noSign	1.10643	0.0107019	yes	up
LOC113802357	ras-related C3 botulinum toxin substrate 1-like, transcript variant X1	2.83532	0.0023835	yes	up	0	1	No	noSign
LOC113824267	serine/threonine-protein phosphatase 2A regulatory subunit B'' subunit beta-like, transcript variant X1	-1.78864	0.000572657	yes	down	2.0831	0.00471557	yes	up
LOC113811749	ras-related protein ced-10-like, transcript variant X1	-1.18367	0.040846	yes	down	0	1	No	noSign
LOC113821778	probable flavin-containing monoamine oxidase A	1.42085	0.0447697	yes	up	0	1	No	noSign
LOC113817289	AMP deaminase 2-like	0	1	No	noSign	1.51749	0.00637307	yes	up
LOC113823539	aminopeptidase N-like, transcript variant X2	0	1	No	noSign	2.29518	0.0145758	yes	up
LOC113810792	neuroblastoma-amplified sequence-like	2.13368	0.021266	yes	up	0	1	No	noSign
LOC113811350	cytosol aminopeptidase-like, transcript variant X1	1.70781	0.0029281	yes	up	0	1	No	noSign
LOC113811467	acetyl-coenzyme A synthetase, cytoplasmic-like	2.16193	0.00171034	yes	up	0	1	No	noSign
LOC113809589	ras-like protein 2, transcript variant X1	0	1	No	noSign	1.23424	0.0252916	yes	up
LOC113816164	calcium/calmodulin-dependent protein kinase kinase 1-like	-1.62704	0.0194299	yes	down	0	1	No	noSign
LOC113819349	phosphoenolpyruvate carboxykinase, cytosolic [GTP]-like	0	1	No	noSign	2.0232	0.0246626	yes	up
LOC113806048	0	1.28032	0.000419654	yes	up	0	1	No	noSign
LOC113808016	tuberin-like	0	1	No	noSign	1.56181	0.00118318	yes	up
LOC113804844	paired amphipathic helix protein Sin3b-like	-1.48004	0.00219137	yes	down	0	1	No	noSign
LOC113817626	aminopeptidase N-like	-1.22755	0.048746	yes	down	-2.69311	0.0207456	yes	down
LOC113830594	3-phosphoinositide-dependent protein kinase 1-like, transcript variant X1	0	1	No	noSign	1.96291	3.59524e-06	yes	up
LOC113813757	calcium-transporting ATPase sarcoplasmic/endoplasmic reticulum type-like	1.38266	0.046012	yes	up	0	1	No	noSign
LOC113829127	peroxisomal acyl-coenzyme A oxidase 1-like, transcript variant X2	0	1	No	noSign	-4.32419	0.0030446	yes	down
LOC113804955	calcium-transporting ATPase sarcoplasmic/endoplasmic reticulum type-like	0	1	No	noSign	1.28391	0.0133743	yes	up
LOC113809844	ras-like GTP-binding protein Rho1, transcript variant X1	3.41797	0.0405984	yes	up	0	1	No	noSign
LOC113809344	regulatory-associated protein of mTOR-like	0	1	No	noSign	1.47165	0.0246965	yes	up
LOC113817000	ribosomal protein S6 kinase beta-1-like	-1.16537	0.0128972	yes	down	0	1	No	noSign
LOC113806574	protein Mo25-like	0	1	No	noSign	4.97851	0.0132119	yes	up
LOC113822890	probable 4-coumarate--CoA ligase 3	4.59374	0.0231239	yes	up	-4.05086	1.96505e-12	yes	down
LOC113814208	long-chain-fatty-acid--CoA ligase ACSBG2-like, transcript variant X3	1.45952	0.0363357	yes	up	-2.07715	0.00164258	yes	down
LOC113816545	0	-1.44312	0.0126969	yes	down	0	1	No	noSign
LOC113804621	4-coumarate--CoA ligase 1-like	0	1	No	noSign	-8.19349	3.99891e-29	yes	down
LOC113810591	adiponectin receptor protein-like	0	1	No	noSign	1.85256	0.00709665	yes	up
LOC113810582	adiponectin receptor protein-like	0	1	No	noSign	1.5403	0.0410625	yes	up
LOC113819728	uncharacterized LOC113819728	0	1	No	noSign	1.65888	0.0200532	yes	up
LOC113819272	aromatic-L-amino-acid decarboxylase-like	0	1	No	noSign	-3.97322	0.000276145	yes	down
LOC113815505	vesicle-associated membrane protein 7-like	-1.17865	0.0473185	yes	down	0	1	No	noSign
LOC113806421	AMP deaminase 2-like	0	1	No	noSign	1.82998	0.00277473	yes	up
LOC113820508	box A-binding factor-like, transcript variant X2	-1.4578	0.00686105	yes	down	0	1	No	noSign
LOC113808838	CREB-binding protein-like, transcript variant X2	0	1	No	noSign	4.13262	0.00785712	yes	up
LOC113810111	4-coumarate--CoA ligase-like 5	0	1	No	noSign	-1.71428	0.0145688	yes	down
LOC113802710	acyl-CoA synthetase family member 2, mitochondrial-like	0	1	No	noSign	-6.25462	4.04797e-17	yes	down
LOC113820069	V-type proton ATPase subunit S1-like	0	1	No	noSign	-1.33458	0.0223023	yes	down
LOC113821147	insulin receptor substrate 1-B-like	0	1	No	noSign	4.55887	0.00143135	yes	up
LOC113825420	long-chain fatty acid transport protein 4-like, transcript variant X3	1.67666	7.66205e-06	yes	up	0	1	No	noSign
LOC113808017	tuberin-like, transcript variant X3	0	1	No	noSign	1.79445	0.014904	yes	up
LOC113821156	insulin receptor substrate 1-like	0	1	No	noSign	7.1589	5.43181e-06	yes	up
LOC113817213	cAMP-responsive element-binding protein-like 2	0	1	No	noSign	1.36948	0.0264842	yes	up
LOC113828134	5'-AMP-activated protein kinase subunit beta-1-like, transcript variant X2	0	1	No	noSign	-1.03962	0.0451808	yes	down
LOC113828203	nicotinamide phosphoribosyltransferase-like	1.89836	7.56934e-05	yes	up	0	1	No	noSign
LOC113826393	4-coumarate--CoA ligase 1-like	0	1	No	noSign	-2.99064	0.0197587	yes	down
LOC113819304	acetyl-coenzyme A synthetase, cytoplasmic-like	1.57913	6.51709e-06	yes	up	0	1	No	noSign
LOC113829325	uncharacterized LOC113829325	0	1	No	noSign	1.24537	0.00485087	yes	up
LOC113822883	aromatic-L-amino-acid decarboxylase-like	0	1	No	noSign	-3.36913	0.00671361	yes	down
LOC113815940	fatty acid synthase-like	0	1	No	noSign	6.22651	5.50737e-08	yes	up
LOC113803710	cyclic AMP-dependent transcription factor ATF-4-like	2.86479	0.00332848	yes	up	0	1	No	noSign
LOC113827164	glucose-6-phosphatase-like	0	1	No	noSign	-3.10131	0.000888238	yes	down
LOC113820016	forkhead box protein O-like, transcript variant X1	-2.20193	0.00397726	yes	down	1.55686	0.0349225	yes	up
LOC113827708	fructose-1,6-bisphosphatase 1-like, transcript variant X1	0	1	No	noSign	-1.44579	0.00207476	yes	down
LOC113804700	probable 4-coumarate--CoA ligase 1, transcript variant X3	0	1	No	noSign	-6.82128	7.26124e-19	yes	down
LOC113820067	V-type proton ATPase subunit S1-like	0	1	No	noSign	-1.33458	0.0223023	yes	down
LOC113808348	lysosome-associated membrane glycoprotein 1-like	-1.16929	0.0299682	yes	down	-1.32372	0.015137	yes	down
LOC113805473	uncharacterized phosphotransferase YvkC-like	1.11219	0.0371099	yes	up	0	1	No	noSign
LOC113830537	adenylosuccinate lyase-like	1.26888	0.00575301	yes	up	0	1	No	noSign
LOC113811408	protein still life, isoforms C/SIF type 2-like	-1.45724	0.0199224	yes	down	0	1	No	noSign
LOC113819734	0	0	1	No	noSign	2.10321	0.000256546	yes	up
LOC113811689	gamma-aminobutyric acid receptor-associated protein-like	-1.38996	0.0112591	yes	down	0	1	No	noSign
ATP6	ATP synthase F0 subunit 6	0	1	No	noSign	-1.42481	0.0212292	yes	down
LOC113826027	V-type proton ATPase 21 kDa proteolipid subunit-like	0	1	No	noSign	-1.43	0.0231842	yes	down
LOC113809108	ATP synthase subunit g, mitochondrial-like	0	1	No	noSign	-1.17846	0.0213637	yes	down
LOC113829397	ATP synthase subunit e, mitochondrial-like	0	1	No	noSign	-1.24571	0.00613208	yes	down
LOC113809595	uncharacterized LOC113809595	0	1	No	noSign	-1.60019	7.742e-05	yes	down
LOC113818074	ATP synthase-coupling factor 6, mitochondrial-like	0	1	No	noSign	-1.66354	0.00168813	yes	down
LOC113811052	ATP synthase subunit delta, mitochondrial-like	1.15804	0.016286	yes	up	-1.00894	0.0308848	yes	down
LOC113820069	V-type proton ATPase subunit S1-like	0	1	No	noSign	-1.33458	0.0223023	yes	down
LOC113816732	calphotin-like	2.83797	1.28497e-07	yes	up	0	1	No	noSign
LOC113820067	V-type proton ATPase subunit S1-like	0	1	No	noSign	-1.33458	0.0223023	yes	down
LOC113811228	putative ATP synthase subunit f, mitochondrial	0	1	No	noSign	-1.03406	0.0228969	yes	down
LOC113816128	hypoxanthine-guanine phosphoribosyltransferase-like, transcript variant X1	1.6621	0.000323294	yes	up	0	1	No	noSign
LOC113824641	ribonucleoside-diphosphate reductase large subunit-like	1.2578	0.0479208	yes	up	0	1	No	noSign
LOC113826905	ribose-phosphate pyrophosphokinase 2, transcript variant X1	0	1	No	noSign	-1.10017	0.00470685	yes	down
LOC113814903	S-methyl-5'-thioadenosine phosphorylase-like	1.69434	8.07839e-05	yes	up	0	1	No	noSign
LOC113825163	DNA-directed RNA polymerase I subunit RPA2-like	0	1	No	noSign	-1.54284	0.0460724	yes	down
LOC113803468	S-methyl-5'-thioadenosine phosphorylase-like	1.41018	0.00610203	yes	up	0	1	No	noSign
LOC113812627	cytochrome c oxidase subunit 5B, mitochondrial-like	0	1	No	noSign	0	1	No	noSign
LOC113829340	cytochrome c oxidase subunit 6A, mitochondrial-like	0	1	No	noSign	0	1	No	noSign
LOC113827372	cytochrome c oxidase subunit NDUFA4-like	0	1	No	noSign	0	1	No	noSign
LOC113825162	cytochrome c, transcript variant X1	0	1	No	noSign	0	1	No	noSign
LOC113816769	NADH dehydrogenase [ubiquinone] iron-sulfur protein 5-like	0	1	No	noSign	0	1	No	noSign
COX1	cytochrome c oxidase subunit I	0	1	No	noSign	0	1	No	noSign
LOC113825965	cytochrome c oxidase assembly protein COX16 homolog, mitochondrial-like	0	1	No	noSign	0	1	No	noSign
LOC113827976	cytochrome c oxidase subunit 4 isoform 1, mitochondrial-like	0	1	No	noSign	0	1	No	noSign
LOC113828339	cytochrome c oxidase subunit 6C-1-like	0	1	No	noSign	0	1	No	noSign
LOC113805266	cytochrome c1, heme protein, mitochondrial-like	0	1	No	noSign	0	1	No	noSign
LOC113805339	phosphoglucomutase-2-like	1.16069	0.0154315	yes	up	-1.12173	0.000418353	yes	down
LOC113809016	phosphoglucomutase-1-like	1.99239	0.0219501	yes	up	0	1	No	noSign
LOC113825393	hexokinase-1-like	0	1	No	noSign	-1.57277	0.0276191	yes	down
