# Supplementary material for: Dynamic Interplay of Metabolic and Transcriptional Responses in Shrimp during Early and Late Infection Stages of Enterocytozoon hepatopenaei (EHP)
Source: Int J Mol Sci. 2023 Nov 25;24(23):16738. doi: 10.3390/ijms242316738 (PMC10706788; doi:10.3390/ijms242316738)
Supplement: Supplementary file 1 [file ijms-24-16738-s001.zip › Table S4.xlsx]

## Sheet: Figure 10
Purine metabolism
Gene ID	Gene Description	KO_id	KO_name
LOC113818958	purine nucleoside phosphorylase-like, transcript variant X1	K03783	punA, PNP
LOC113808654	high affinity cAMP-specific and IBMX-insensitive 3',5'-cyclic phosphodiesterase 8B-like, transcript variant X2	K18437	PDE8
LOC113821273	xanthine dehydrogenase/oxidase-like	K00106	XDH
LOC113813657	dual 3',5'-cyclic-AMP and -GMP phosphodiesterase 11-like	K13298	PDE11
LOC113810628	cancer-related nucleoside-triphosphatase homolog, transcript variant X1	K06928	NTPCR
LOC113816325	indole-3-acetaldehyde oxidase-like	K00106	XDH
LOC113822117	xanthine dehydrogenase/oxidase-like	K00106	XDH
LOC113828822	pyruvate kinase-like, transcript variant X1	K00873	PK, pyk
LOC113825750	adenylate cyclase type 2-like	K01768	E4.6.1.1
LOC113803114	ectonucleoside triphosphate diphosphohydrolase 5-like	K01511	ENTPD5_6
LOC113809017	phosphoglucomutase-1-like	K01835	pgm
LOC113801069	bifunctional 3'-phosphoadenosine 5'-phosphosulfate synthase-like, transcript variant X2	K13811	PAPSS
LOC113826905	ribose-phosphate pyrophosphokinase 2, transcript variant X1	K00948	PRPS, prsA
LOC113828804	cAMP and cAMP-inhibited cGMP 3',5'-cyclic phosphodiesterase 10A-like	K18438	PDE10
LOC113822118	xanthine dehydrogenase/oxidase-like	K00106	XDH
LOC113807491	uncharacterized LOC113807491, transcript variant X1	K01487	E3.5.4.3, guaD
LOC113803334	xanthine dehydrogenase/oxidase-like, transcript variant X1	K00106	XDH
LOC113825741	mannosylglucosyl-3-phosphoglycerate phosphatase-like	K01081	E3.1.3.5
LOC113820552	ADP-sugar pyrophosphatase-like, transcript variant X3	K13987	NUDT5
LOC113806421	AMP deaminase 2-like	K01490	AMPD
LOC113826137	uncharacterized LOC113826137, transcript variant X4	K16855	NUDT16
LOC113807505	guanine deaminase-like	K01487	E3.5.4.3, guaD
LOC113805339	phosphoglucomutase-2-like	K15779	PGM2
LOC113821249	indole-3-acetaldehyde oxidase-like	K00106	XDH
LOC113816883	probable 3',5'-cyclic phosphodiesterase pde-5	K18438	PDE10

## Sheet: Figure 11
glutathione metabolism
Gene ID	Gene Description	KO_id	KO_name
LOC113808340	pyrimidodiazepine synthase-like	K00310	SE
LOC113829084	microsomal glutathione S-transferase 3-like, transcript variant X1	K00799	GST, gst
LOC113815852	-	K00432	gpx, btuE, bsaA
LOC113815347	putative glutathione-specific gamma-glutamylcyclotransferase 2	K07232	CHAC, chaC
LOC113817114	ornithine decarboxylase-like	K01581	E4.1.1.17, ODC1, speC, speF
LOC113822637	microsomal glutathione S-transferase 1-like, transcript variant X2	K00799	GST, gst
LOC113817770	glutathione S-transferase class-mu 26 kDa isozyme 47-like	K00799	GST, gst
LOC113820218	putative aminopeptidase W07G4.4	K01255	CARP, pepA
LOC113823675	peroxiredoxin-6-like	K11188	PRDX6
LOC113819894	glutathione peroxidase 2-like	K00432	gpx, btuE, bsaA
LOC113821256	uncharacterized LOC113821256	K00799	GST, gst
LOC113801977	-	K00310	SE
LOC113819893	glutathione peroxidase 2-like	K00432	gpx, btuE, bsaA
LOC113810100	-	K00432	gpx, btuE, bsaA
LOC113809596	hematopoietic prostaglandin D synthase-like, transcript variant X1	K04097	HPGDS
LOC113801166	glutathione S-transferase Mu 1-like	K00799	GST, gst
LOC113826603	glucose-6-phosphate 1-dehydrogenase-like	K00036	G6PD, zwf
LOC113821773	spermine synthase-like	K00802	SMS
LOC113829900	5-oxoprolinase pseudogene	K01469	OPLAH, OXP1, oplAH
LOC113823539	aminopeptidase N-like, transcript variant X2	K11140	ANPEP, CD13
LOC113809598	hematopoietic prostaglandin D synthase-like	K04097	HPGDS
LOC113811350	cytosol aminopeptidase-like, transcript variant X1	K11142	LAP3
LOC113821223	glutathione S-transferase 1-like, transcript variant X1	K00799	GST, gst
LOC113816686	glutathione peroxidase-like	K00432	gpx, btuE, bsaA
LOC113817626	aminopeptidase N-like	K11140	ANPEP, CD13
LOC113812983	glutathione S-transferase theta-1-like	K00799	GST, gst
LOC113825151	spermine synthase-like	K00802	SMS
LOC113807157	-	K13299	GSTK1
LOC113826926	glutathione S-transferase theta-1-like	K00799	GST, gst
LOC113829050	microsomal glutathione S-transferase 3-like, transcript variant X1	K00799	GST, gst
LOC113817634	glutathione S-transferase T2-like	K00799	GST, gst
LOC113829262	glutathione S-transferase Mu 3-like	K00799	GST, gst
LOC113807146	glutathione S-transferase kappa 1-like, transcript variant X1	K13299	GSTK1
LOC113812551	glutathione S-transferase 1-like	K00799	GST, gst
LOC113827876	glutathione S-transferase Mu 1-like	K00799	GST, gst
LOC113813522	glutathione S-transferase 1-like	K00799	GST, gst
LOC113823540	glutathione S-transferase theta-1-like	K00799	GST, gst
LOC113818669	pyrimidodiazepine synthase-like	K00310	SE
LOC113811885	isocitrate dehydrogenase [NADP] cytoplasmic-like	K00031	IDH1, IDH2, icd
LOC113804803	-	K11140	ANPEP, CD13
LOC113823673	peroxiredoxin-6-like	K11188	PRDX6
LOC113812552	glutathione S-transferase 1-like	K00799	GST, gst
LOC113817342	pyrimidodiazepine synthase-like, transcript variant X1	K00310	SE

## Sheet: Figure 12a
glycerophospholipid metabolism
Gene ID	Gene Description	KO_id	KO_name
LOC113806231	phosphatidylserine synthase 1-like	K08729	PTDSS1
LOC113806065	ethanolamine kinase 1-like	K00894	ETNK, EKI
LOC113803871	hemocyanin C chain-like	K05929	E2.1.1.103, NMT
LOC113823538	ethanolamine-phosphate cytidylyltransferase-like	K00967	PCYT2
LOC113804714	5-phosphohydroxy-L-lysine phospho-lyase-like	K14286	AGXT2L1, ETNPPL
LOC113818469	5-phosphohydroxy-L-lysine phospho-lyase-like	K14286	AGXT2L1, ETNPPL
LOC113812717	uncharacterized LOC113812717	K00629	GPAT1_2
LOC113805268	group XV phospholipase A2-like	K06129	LYPLA3
LOC113826162	lysophospholipid acyltransferase 5-like, transcript variant X1	K13515	LPCAT3, MBOAT5

## Sheet: Figure 12b
sphingolipid metabolism
Gene ID	Gene Description	KO_id	KO_name
LOC113813573	multidrug resistance-associated protein 1-like	K05665	ABCC1
LOC113821554	glucosylceramidase-like	K01201	GBA, srfJ
LOC113821014	sphingomyelin phosphodiesterase-like	K12350	SMPD1, ASM
LOC113810625	sphingomyelin phosphodiesterase-like	K12350	SMPD1, ASM
LOC113810646	sphingomyelin phosphodiesterase-like	K12350	SMPD1, ASM
LOC113824266	serine/threonine-protein phosphatase 2A regulatory subunit B'' subunit beta-like	K11583	PPP2R3
LOC113821544	-	K01201	GBA, srfJ
LOC113806325	UDP-glucuronosyltransferase 2B14-like, transcript variant X1	K00699;K04628	UGT;CGT, UGT8
LOC113802357	ras-related C3 botulinum toxin substrate 1-like, transcript variant X1	K04392	RAC1
LOC113824267	serine/threonine-protein phosphatase 2A regulatory subunit B'' subunit beta-like, transcript variant X1	K11583	PPP2R3
LOC113811749	ras-related protein ced-10-like, transcript variant X1	K04392	RAC1
LOC113812851	sphingomyelin phosphodiesterase-like, transcript variant X2	K12350	SMPD1, ASM
LOC113828906	sphingomyelin phosphodiesterase-like, transcript variant X1	K12350	SMPD1, ASM
LOC113824094	glucosylceramidase-like	K01201	GBA, srfJ
LOC113809844	ras-like GTP-binding protein Rho1, transcript variant X1	K04513	RHOA
LOC113824103	putative glucosylceramidase 3	K01201	GBA, srfJ
LOC113800179	protein kinase C-like	K18050	PRKCE
LOC113819729	very-long-chain (3R)-3-hydroxyacyl-CoA dehydratase hpo-8-like	K10703	HACD, PHS1, PAS2
LOC113810321	sphingomyelin phosphodiesterase-like	K12350	SMPD1, ASM
LOC113820508	box A-binding factor-like, transcript variant X2	K11583	PPP2R3
LOC113802190	sphingomyelin phosphodiesterase-like	K12350	SMPD1, ASM
LOC113810638	sphingomyelin phosphodiesterase-like	K12350	SMPD1, ASM
LOC113828923	sphingomyelin phosphodiesterase-like	K12350	SMPD1, ASM
LOC113829804	sphingosine-1-phosphate lyase-like	K01634	SGPL1, DPL1
LOC113829078	galactosylceramide sulfotransferase-like	K09676;K01019	GAL3ST3;GAL3ST1
LOC113828917	sphingomyelin phosphodiesterase-like	K12350	SMPD1, ASM
LOC113816345	phosphatidylcholine_ceramide cholinephosphotransferase 1-like, transcript variant X1	K04714	SGMS
LOC113820190	serine palmitoyltransferase 2-like, transcript variant X2	K00654	SPT
LOC113829809	sphingosine-1-phosphate lyase-like	K01634	SGPL1, DPL1

## Sheet: Figure 13
glutathione metabolism
Gene ID	Gene Description	KO_id	KO_name
LOC113805053	glutathione S-transferase 1-like	K00799	GST, gst
LOC113803630	5-oxoprolinase-like	K01469	OPLAH, OXP1, oplAH
LOC113826359	glutathione peroxidase-like	K00432	gpx, btuE, bsaA
LOC113817477	glutathione S-transferase-like, transcript variant X2	K04097	HPGDS
LOC113817114	ornithine decarboxylase-like	K01581	E4.1.1.17, ODC1, speC, speF
LOC113822637	microsomal glutathione S-transferase 1-like, transcript variant X2	K00799	GST, gst
LOC113820218	putative aminopeptidase W07G4.4	K01255	CARP, pepA
LOC113826602	glucose-6-phosphate 1-dehydrogenase-like	K00036	G6PD, zwf
LOC113821256	uncharacterized LOC113821256	K00799	GST, gst
LOC113824641	ribonucleoside-diphosphate reductase large subunit-like	K10807	RRM1
LOC113829900	5-oxoprolinase pseudogene	K01469	OPLAH, OXP1, oplAH
LOC113811350	cytosol aminopeptidase-like, transcript variant X1	K11142	LAP3
LOC113817626	aminopeptidase N-like	K11140	ANPEP, CD13
LOC113825151	spermine synthase-like	K00802	SMS
LOC113807157	-	K13299	GSTK1
LOC113821236	glutathione S-transferase 1-like	K00799	GST, gst
LOC113829050	microsomal glutathione S-transferase 3-like, transcript variant X1	K00799	GST, gst
LOC113813522	glutathione S-transferase 1-like	K00799	GST, gst
LOC113820074	thioredoxin domain-containing protein 12-like	K05360	TXNDC12
LOC113812552	glutathione S-transferase 1-like	K00799	GST, gst
