# Supplementary material for: Dynamic Interplay of Metabolic and Transcriptional Responses in Shrimp during Early and Late Infection Stages of Enterocytozoon hepatopenaei (EHP)
Source: Int J Mol Sci. 2023 Nov 25;24(23):16738. doi: 10.3390/ijms242316738 (PMC10706788; doi:10.3390/ijms242316738)
Supplement: Supplementary file 1 [file ijms-24-16738-s001.zip › Table S5.xlsx]

## Sheet: Sheet1
Table S5. The primers for detection of pathogens
Pathogens item	Primers	Primer sequence (5′-3′)	product size	amplification procedure
WSSV	W-F1	ACTACTAACTTCAGCCTATCTAG	1447bp	94°C 4min；55°C 1min；72°C 2min 39×（94°C 1min；55°C 1min；72°C 2min） 72°C 5min
	W-R1	TAATGCGGGTGTAATGTTCTTA
	W-F2	GTAACTGCCCCTTCCATCTCCA	941bp
	W-R2	TACGGCAGCTGCTGCACCTTGT
IHHNV	389F	CGGAACACAACCCGACTTTA	389bp	95°C 5min 35×（95°C 30s；55°C 30s； 72°C 1min） 72°C 7min
	389R	GGCCAAGACCAAAATACGAA
AHPND	AP3-F1	ATGAGTAACAATATAAAACATGAAAC	333bp	94°C for 5 min followed by 30 cycles of 94°C for 30 s, 53°C for 30 s and 72°C for 40 s with a final elongation step at 72°C for 7 min
	AP3-R1	GTGGTAATAGATTGTACAGAA
TSV	55P1	GGCGTAGTGAGTAATGTAGC	955bp	The RT-PCR profile was 30 min at 50 °C, followed by 40 cycles of 30 s at 95 °C, 30 s at 60 °C, and 1.5 min at 68 °C.
	55P2	CTTCAGTGACCACGGTATAG
EHP	ENF779	CAGCAGGCGCGAAAATTGTCCA	779bp	The cycling condition consisted of initial denaturation at 94 °C for 3 min followed by 35 cycles of denaturation at 94 °C for 20 s, annealing at 58 °C for 20 s and extension at 72 °C for 45 s with a final extension at 72 °C for 5 min
	ENR779	AAGAGATATTGTATTGCGCTTGCTG
	ENF176	CAACGCGGGAAAACTTACCA	176bp	The PCR reaction conditions consisted of initial denaturation at 94 °C for 3 min followed by 35 cycles of denaturation at 94 °C for 20 s, annealing at 64 °C for 20 s and extension at 72 °C for 20 s with an additional extension at 72 °C for 5 min.
	ENR176	ACCTGTTATTGCCTTCTCCCTCC
YHV	YHV2s	CGGGGTTACCCGCTTATATT	400bp	Presumptive detection of yellow head virus by reverse transcriptase-polymerase chain reaction and dot-blot hybridization in Litopenaeus vannamei and L. stylirostris cultured on the Northwest coast of Mexico
	YHV2as	GCCTGAGGTGAAGTCCATGT
