# Supplementary material for: Dynamic Interplay of Metabolic and Transcriptional Responses in Shrimp during Early and Late Infection Stages of Enterocytozoon hepatopenaei (EHP)
Source: Int J Mol Sci. 2023 Nov 25;24(23):16738. doi: 10.3390/ijms242316738 (PMC10706788; doi:10.3390/ijms242316738)
Supplement: Supplementary file 1 [file ijms-24-16738-s001.zip › Table S6.xlsx]

## Sheet: Sheet1
Table S6. qRT-PCR product sequence details
Primer name	Sequence (5′-3′)	nmol	Tm	OD	Product size
Sequences of primers used in this study (Asn vs Asp).
CLECG4-R	TTGTCGCTGACGCCTTCC	6.6	58.8	1	150
CLECG4-F	GATGCTGGAGGACTTGAGGAG	4.7	57.7	1
AMY1-R	CTCGGGCTGATGATGTTGAAG	4.9	56.1	1	105
AMY1-F	CGTGATGTCGTCGTACTACTG	5.1	55.1	1
RPN2-R	GGCTTGGTCAGGCTTAATTGG	5	56.7	1	126
RPN2-F	GATGAAGTTGATGGGCGGATG	4.7	56.5	1
MAN-R	GGTCGCTTCGGTCCTTCAG	5	58.3	1	118
MAN-F	GCCTACGAGCACGGATACAG	5.9	59	1
LvPLP-R	CTCCGCTGTGGGTCTTGC	6.6	60	1	134
LvPLP-F	TGTCGCCAGTGTTCGTTCG	5.9	58.6	1
CLCA1-R	ATGACGATGCCGACGATGG	5.3	58.2	1	106
CLCA1-F	ATGAAGTGAGGGAGATGGTGTC	4.3	56.5	1
Sequences of primers used in this study (Jsn vs Jsp).
cenE4-R	TTGGTCAGCGAAGTCGTAGAG	4.7	56.8	1	135
cenE4-F	CACCCAGGCACGGAGTTG	5.8	60	1
RPL13a-R	TTGAAGGAGCACGCTGATGG	5.1	58.2	1	113
RPL13a-F	CCTTGTGTTCTCGGGCATTTTC	2.3	56.9	1
MGST3-R	ACCATATAGCACCACCAACGG	4.8	57.4	1	118
MGST3-F	CCACCAGAACACACTTGAGAAC	4.6	56	1
MAN-R	GGTCGCTTCGGTCCTTCAG	5	58.3	1	118
MAN-F	GCCTACGAGCACGGATACAG	5.9	59	1
HcC-R	GGGAGCAGGAATCGGTTAGG	4.8	58.3	1	140
HcC-F	TCAGAATCAGCAGTCACAGTCC	4.6	56.8	1
mtATPase-R	AATGATGGCTGGGTCAACTTTC	4.8	55.4	1	150
mtATPase-F	GCTGCTGTAAGAGGAGAGGTC	4.7	57.6	1
Sequences of primers used in this study (Asn vs Jsn).
CNDP-R	AGCCAGTAGTTGTCGGAGATG	4.7	56.7	1	115
CNDP-F	TCTTTGAGGGAATGGAGGAGTC	4.5	56.2	1
HBPs-R	TTGAATGGTGCGTCGTATGC	5.3	56	1	138
HBPs-F	GAGGAAGTTCGGTGGATATGC	4.7	55.7	1
CP4-R	TCTCCGTCTCGCCGTAGC	6.5	60.4	1	107
CP4-F	CCAGCCGTCCTTCCAGTTC	6.1	59.2	1
MGST3-R	ACCATATAGCACCACCAACGG	4.8	57.3	1	101
MGST3-F	CCACCAGAACACACTTGAGAAC	4.6	56.9	1
AMY1-R	CTCGGGCTGATGATGTTGAAG	4.9	56.1	1	105
AMY1-F	CGTGATGTCGTCGTACTACTG	5.1	55.1	1
DPP1-R	GCAACTGGCGTCCGTATCG	5.7	59.8	1	145
DPP1-F	GTCGTGCTCCGTGCTGTC	6.4	60	1
Sequences of primers used in this study (Asp vs Jsp).
MGST3-R	ACCATATAGCACCACCAACGG	4.8	57.4	1	101
MGST3-F	CCACCAGAACACACTTGAGAAC	4.6	56	1
AMY1-R	CTCGGGCTGATGATGTTGAAG	4.9	56.1	1	105
AMY1-F	CGTGATGTCGTCGTACTACTG	5.1	55.1	1
NEP1-R	GCCACCATAGCATACTTGAAGG	4.6	55.9	1	113
NEP1-F	ACCACAAACCAGCGGACAC	5.3	58.9	1
TECR-R	TTGCCCACACTGCCATCTG	6.1	58.8	1	142
TECR-F	CTCACGCTGCTCTTCAATGC	5.8	57.1	1
NCX1-R	CGCCTTCTGAACCTGGATTAAC	5	56	1	147
NCX1-F	TGGACCATGAAGACGAGCAC	5	57.6	1
Inx2-R	CGCTCCTGTAGTGGCTCTTC	5.8	58.3	1	121
Inx2-F	TGGCTGGTGCTGCTAATGAC	5.4	58.3	1
