# Supplementary figures and images for: Dynamic Interplay of Metabolic and Transcriptional Responses in Shrimp during Early and Late Infection Stages of Enterocytozoon hepatopenaei (EHP)
Source: MDPI journal article supplement (doi:10.3390/ijms242316738), 2023-11-25

**Boxplot of 18s RNA Ct Values Across Groups**

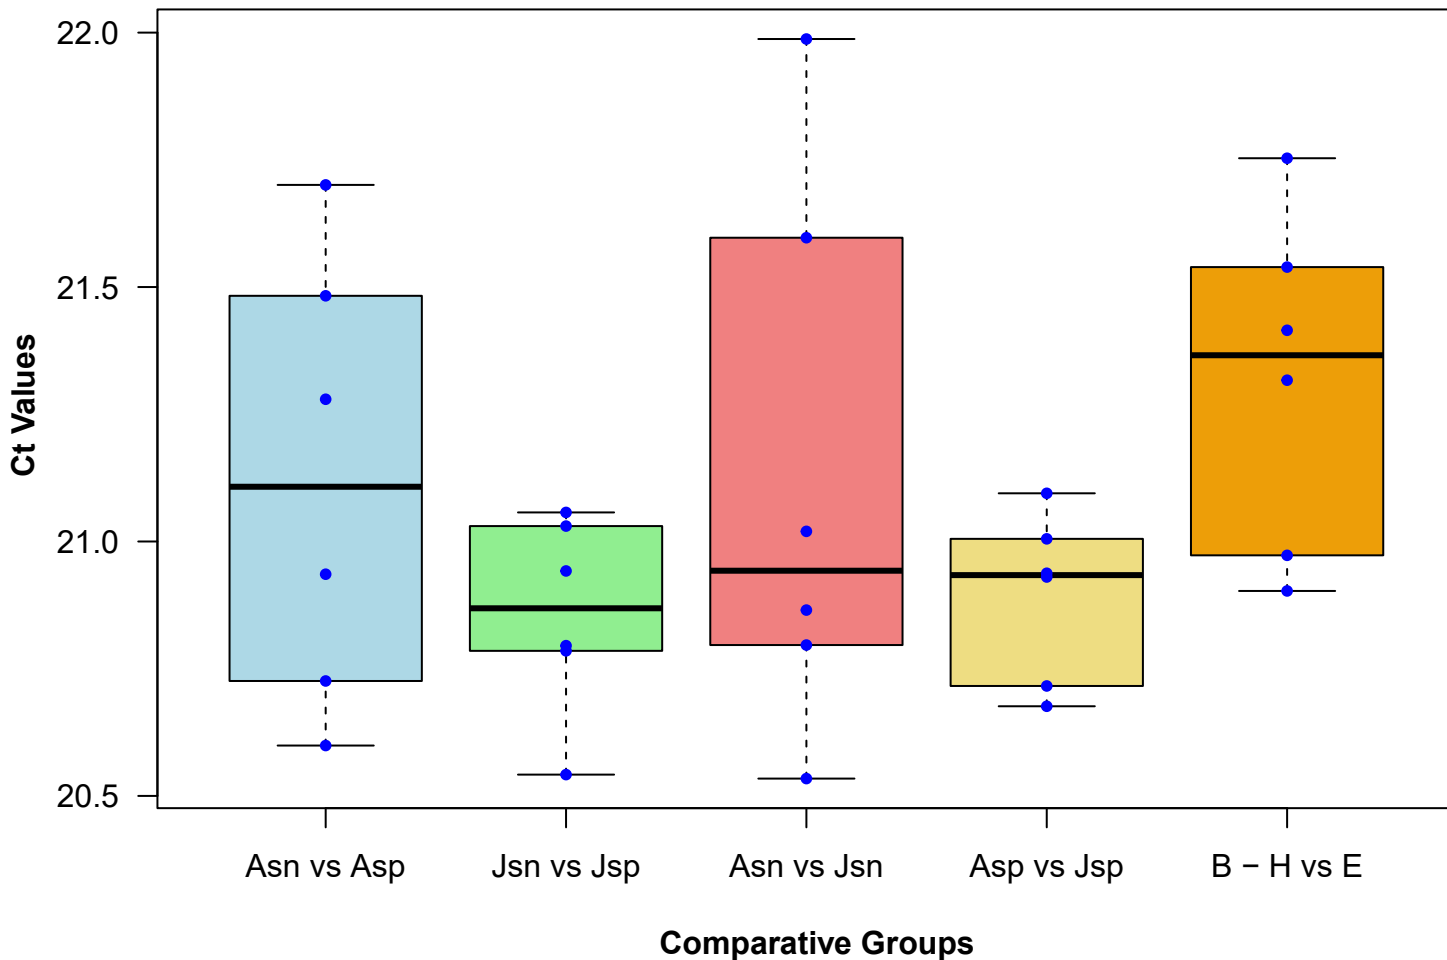

Supplement: s1 [file s1]

## Reads distribution in chromosomes

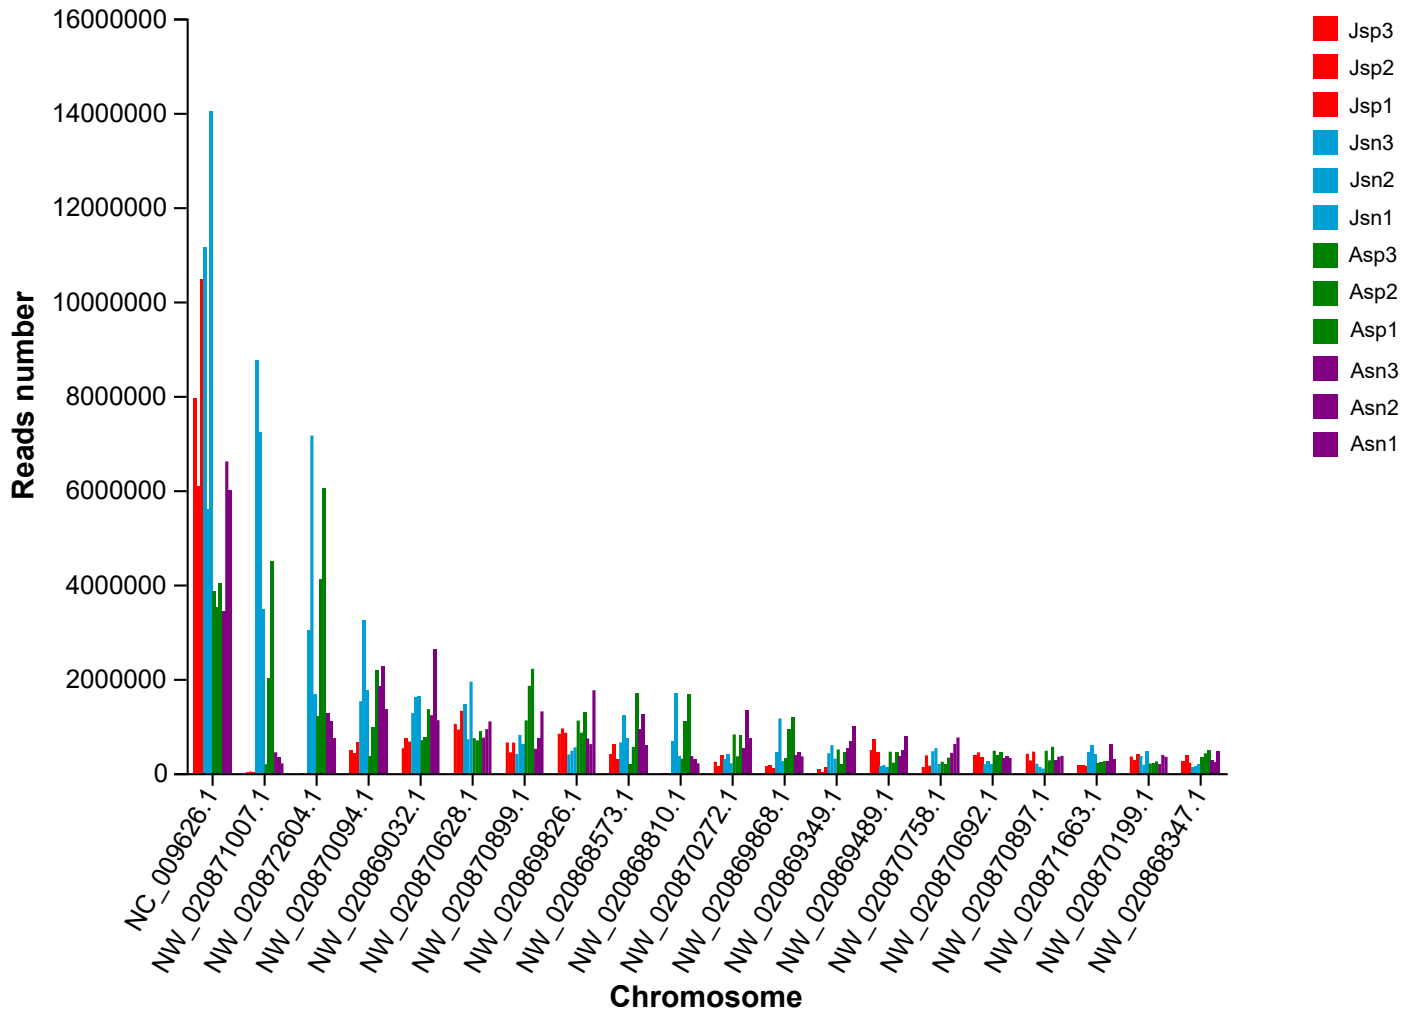

Supplement: s1 [file s1]

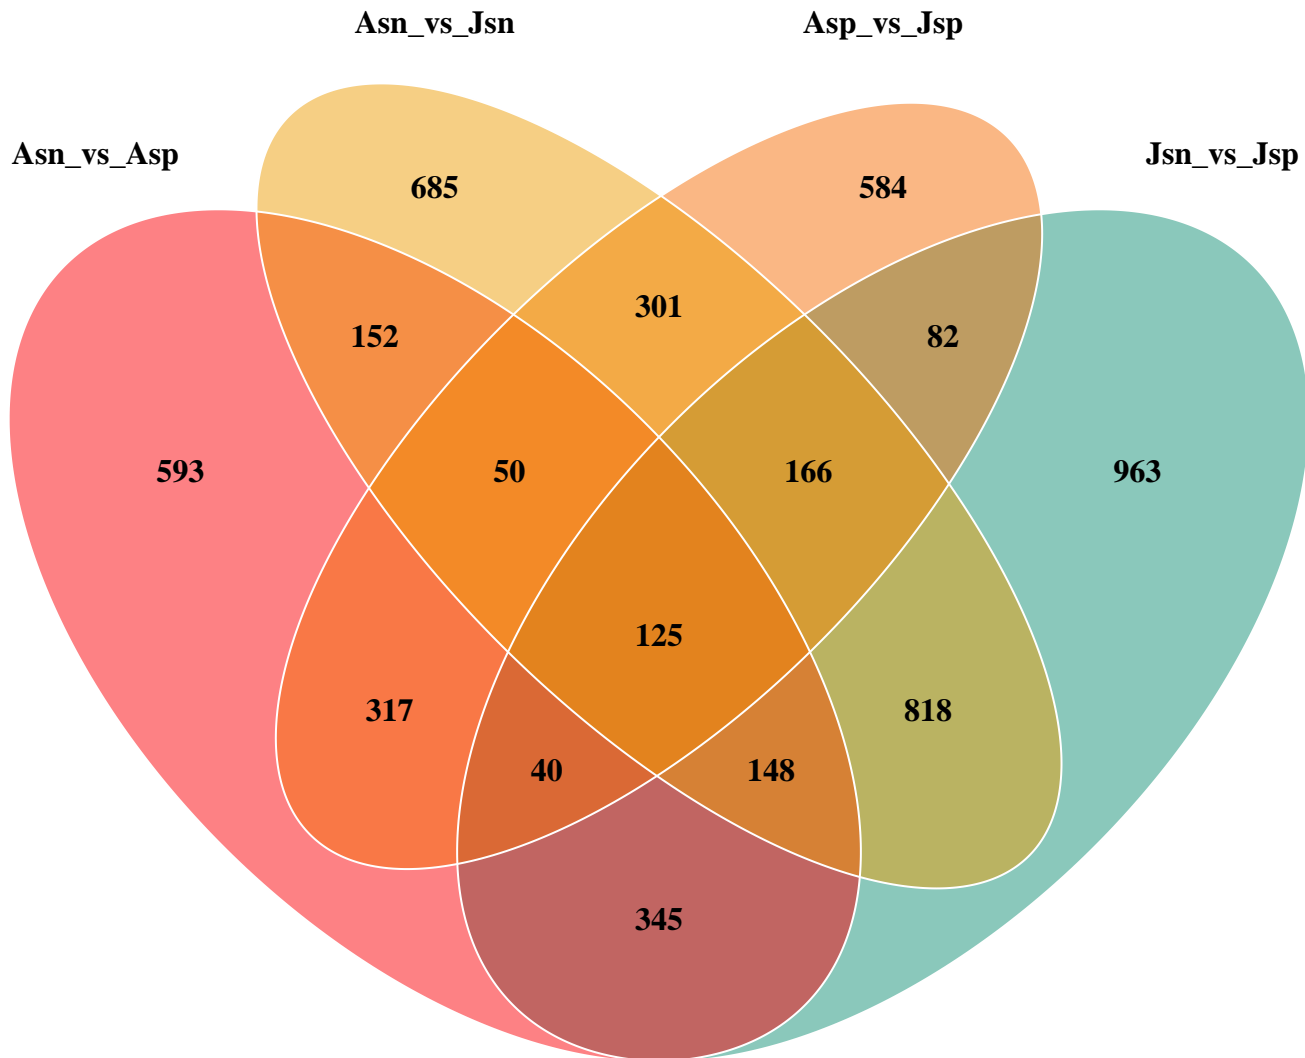

Supplement: s1 [file s1]

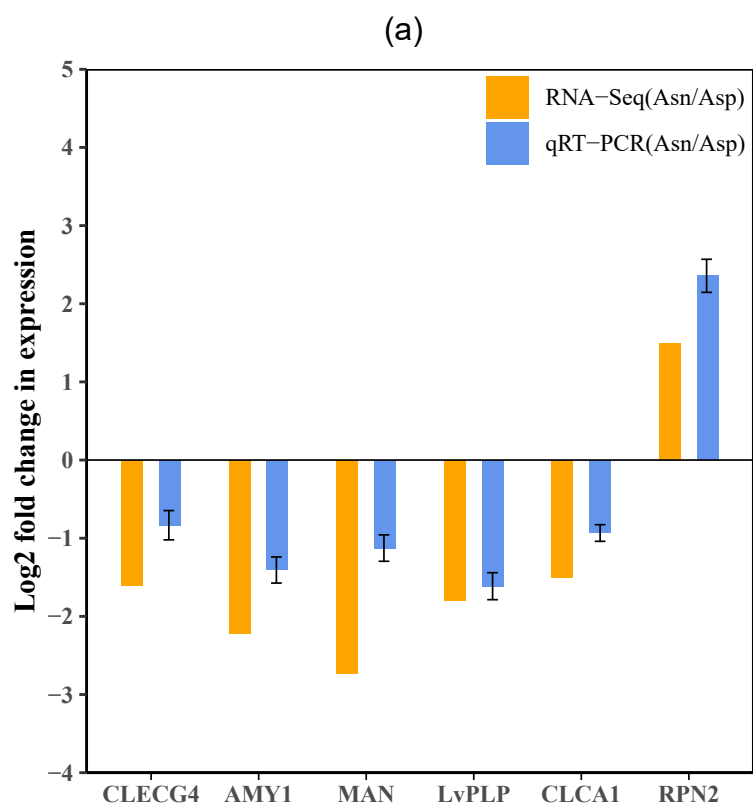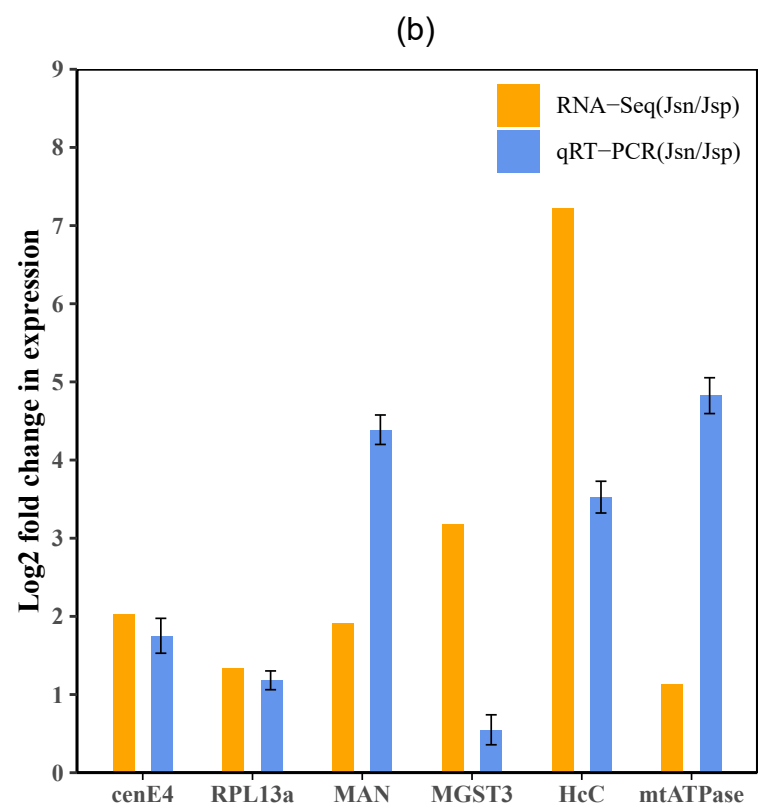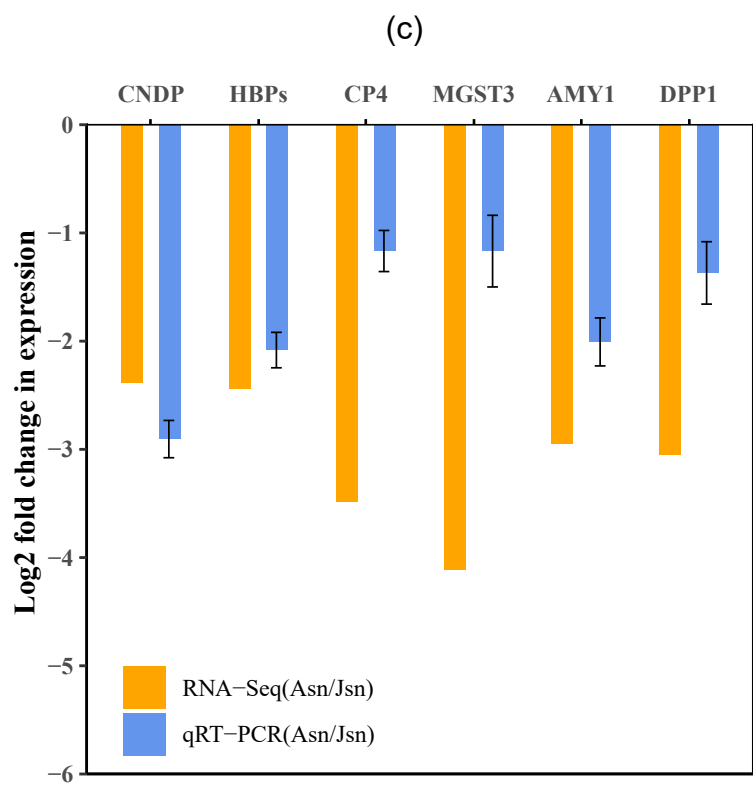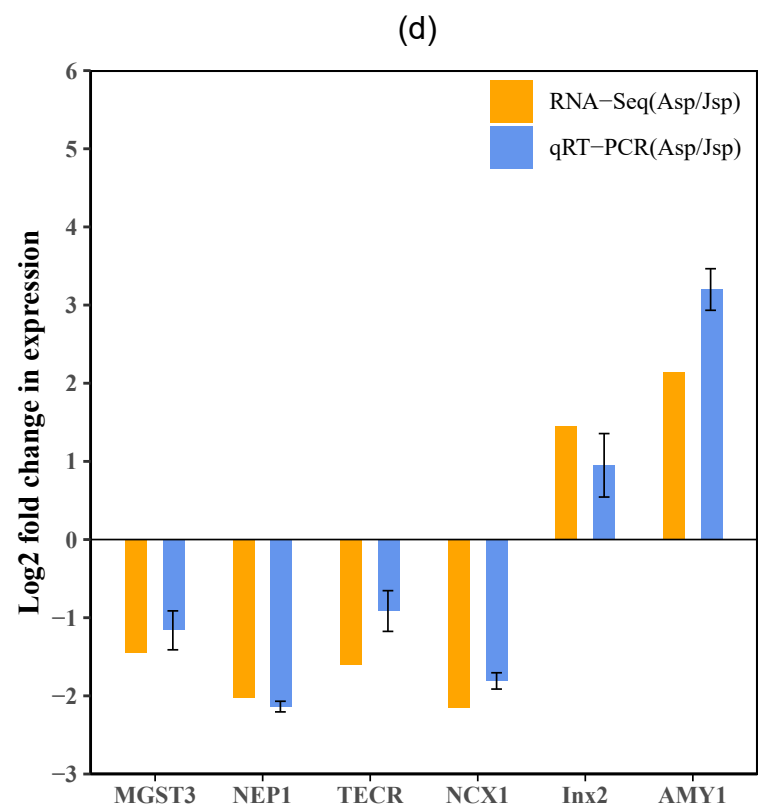

Supplement: s1 [file s1]
